# Supplementary material for: Glycosylation Patterns of HIV-1 gp120 Depend on the Type of Expressing Cells and Affect Antibody Recognition
Source: PubMed Central journal article supplement — J Biol Chem. 2010 May 3;285(27):20860–9. doi: 10.1074/jbc.M109.085472 (PMC2898351; doi:10.1074/jbc.m109.085472), 2010-05-03

Supplemental Figure 3 MALDI TOF mass spectra of N-glycan from five different gp120 preparations. N-linked oligosaccharides were isolated after digestion with PNGase F of gp120 produced by 293T (A), Jurkat (B), RD (C), HepG2 (D), and CHO (E) cell lines. Symbols with numbers indicate number of saccharides added to the common core (GlcNAc)<sub>2</sub>(Man)<sub>3</sub> and the numbers next to the ion peaks indicate molecular mass. Samples prepared with PNGase F enzyme isolated from *Flavobacterium* that contained trace amounts of endo- and exoglycosidases resulted in removing the reducing-end GlcNAc from high-mannose glycans (see methods for details). Identities of these glycans were confirmed by tandem mass spectrometry with LTQ mass spectrometry. \*Denotes high-mannose glycans with (GlcNAc)<sub>1</sub>(Man)<sub>3</sub> core. Representative results from two experiments are shown.

**A**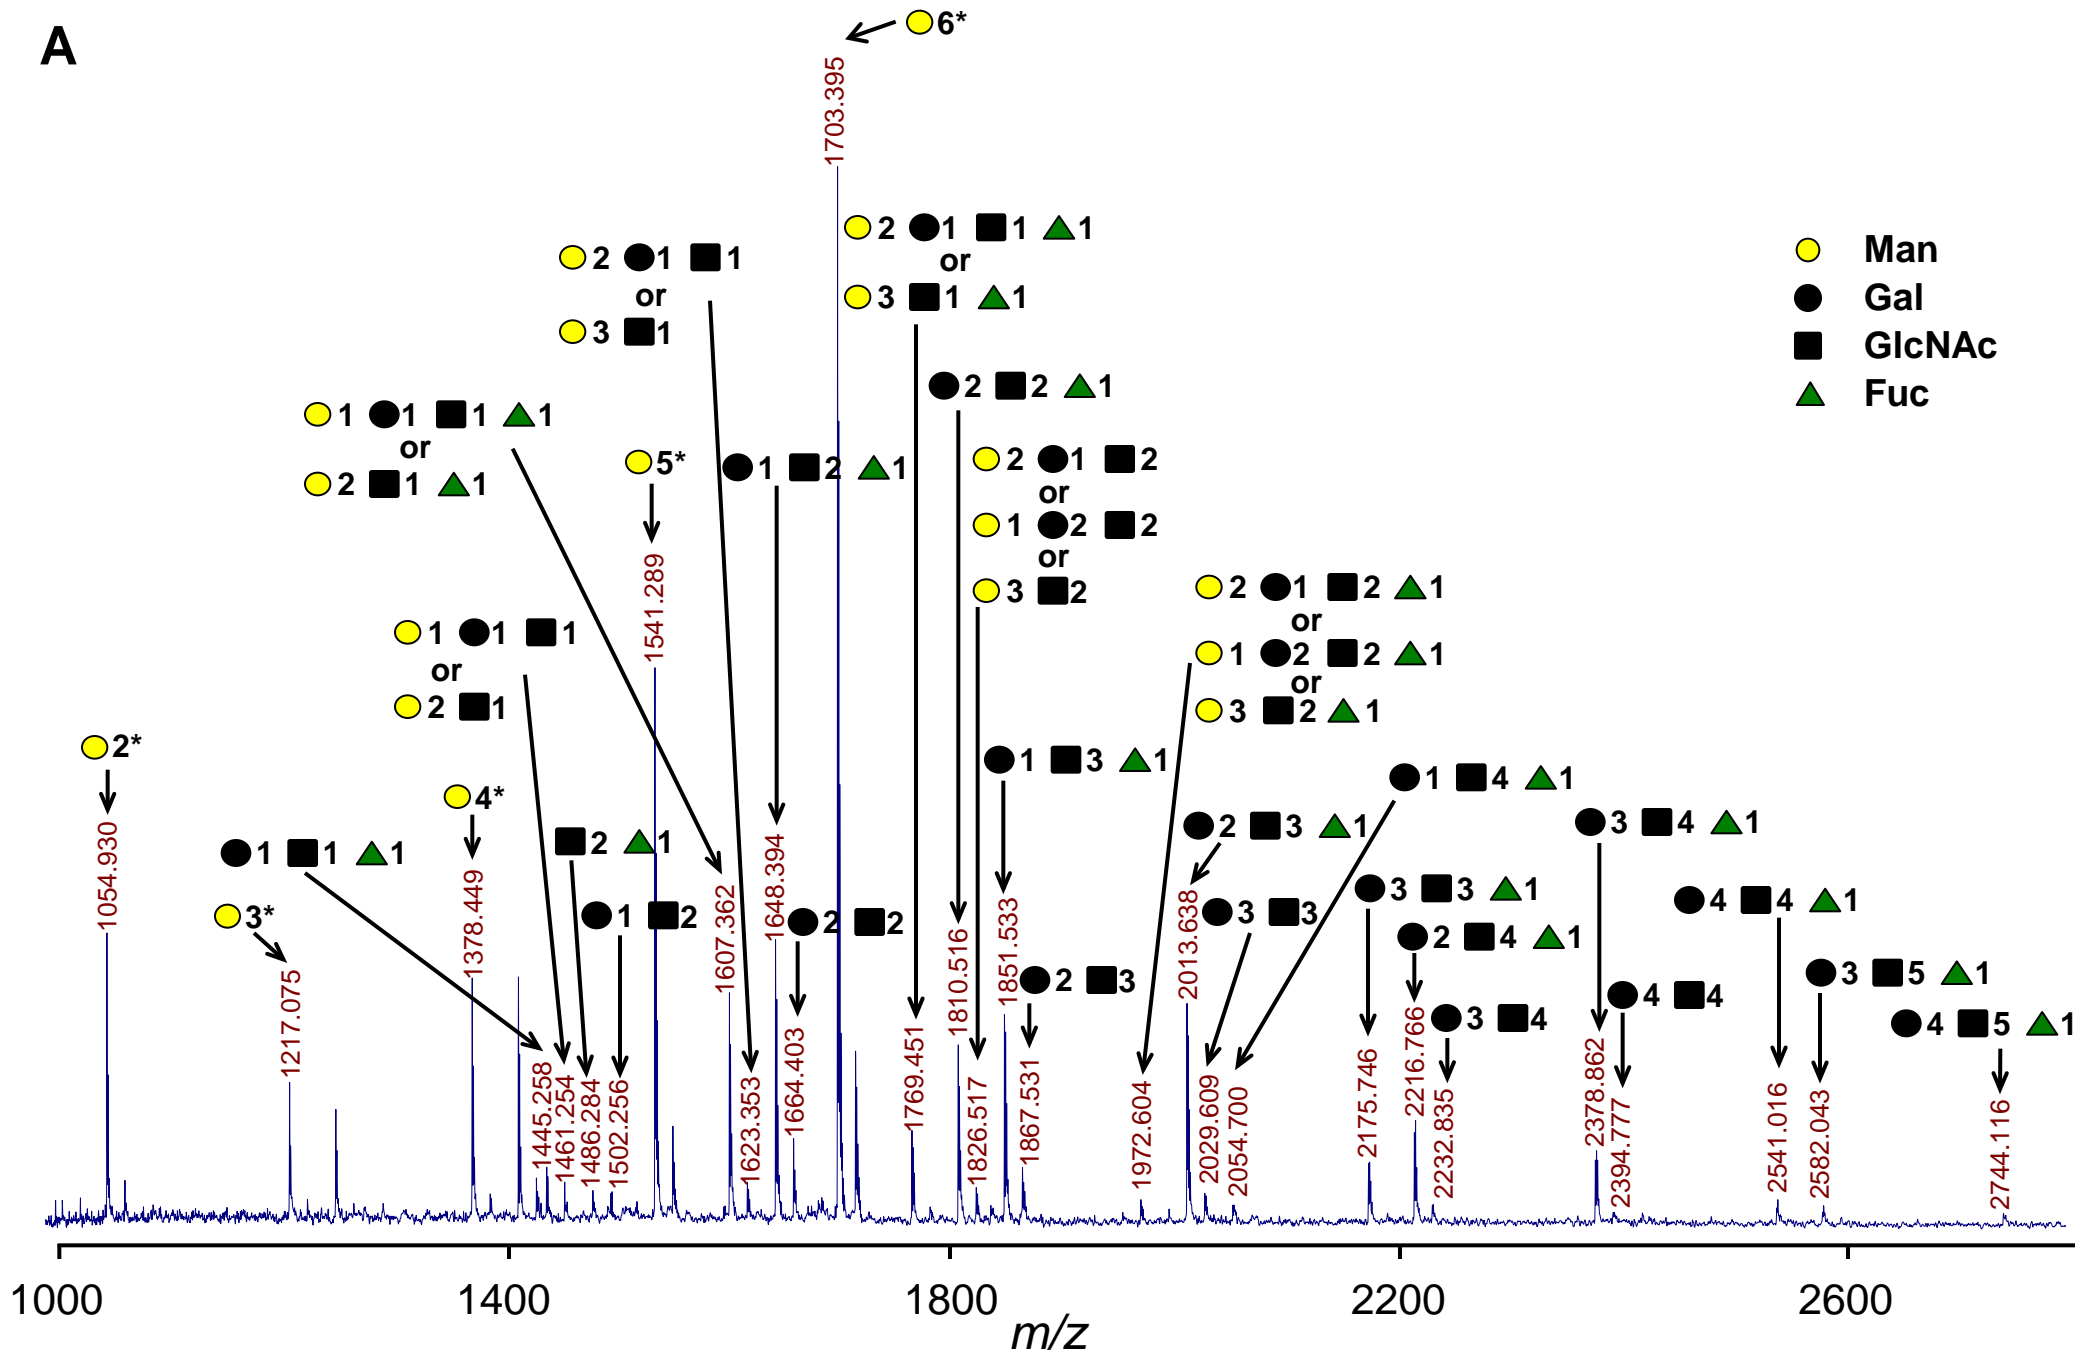

**B**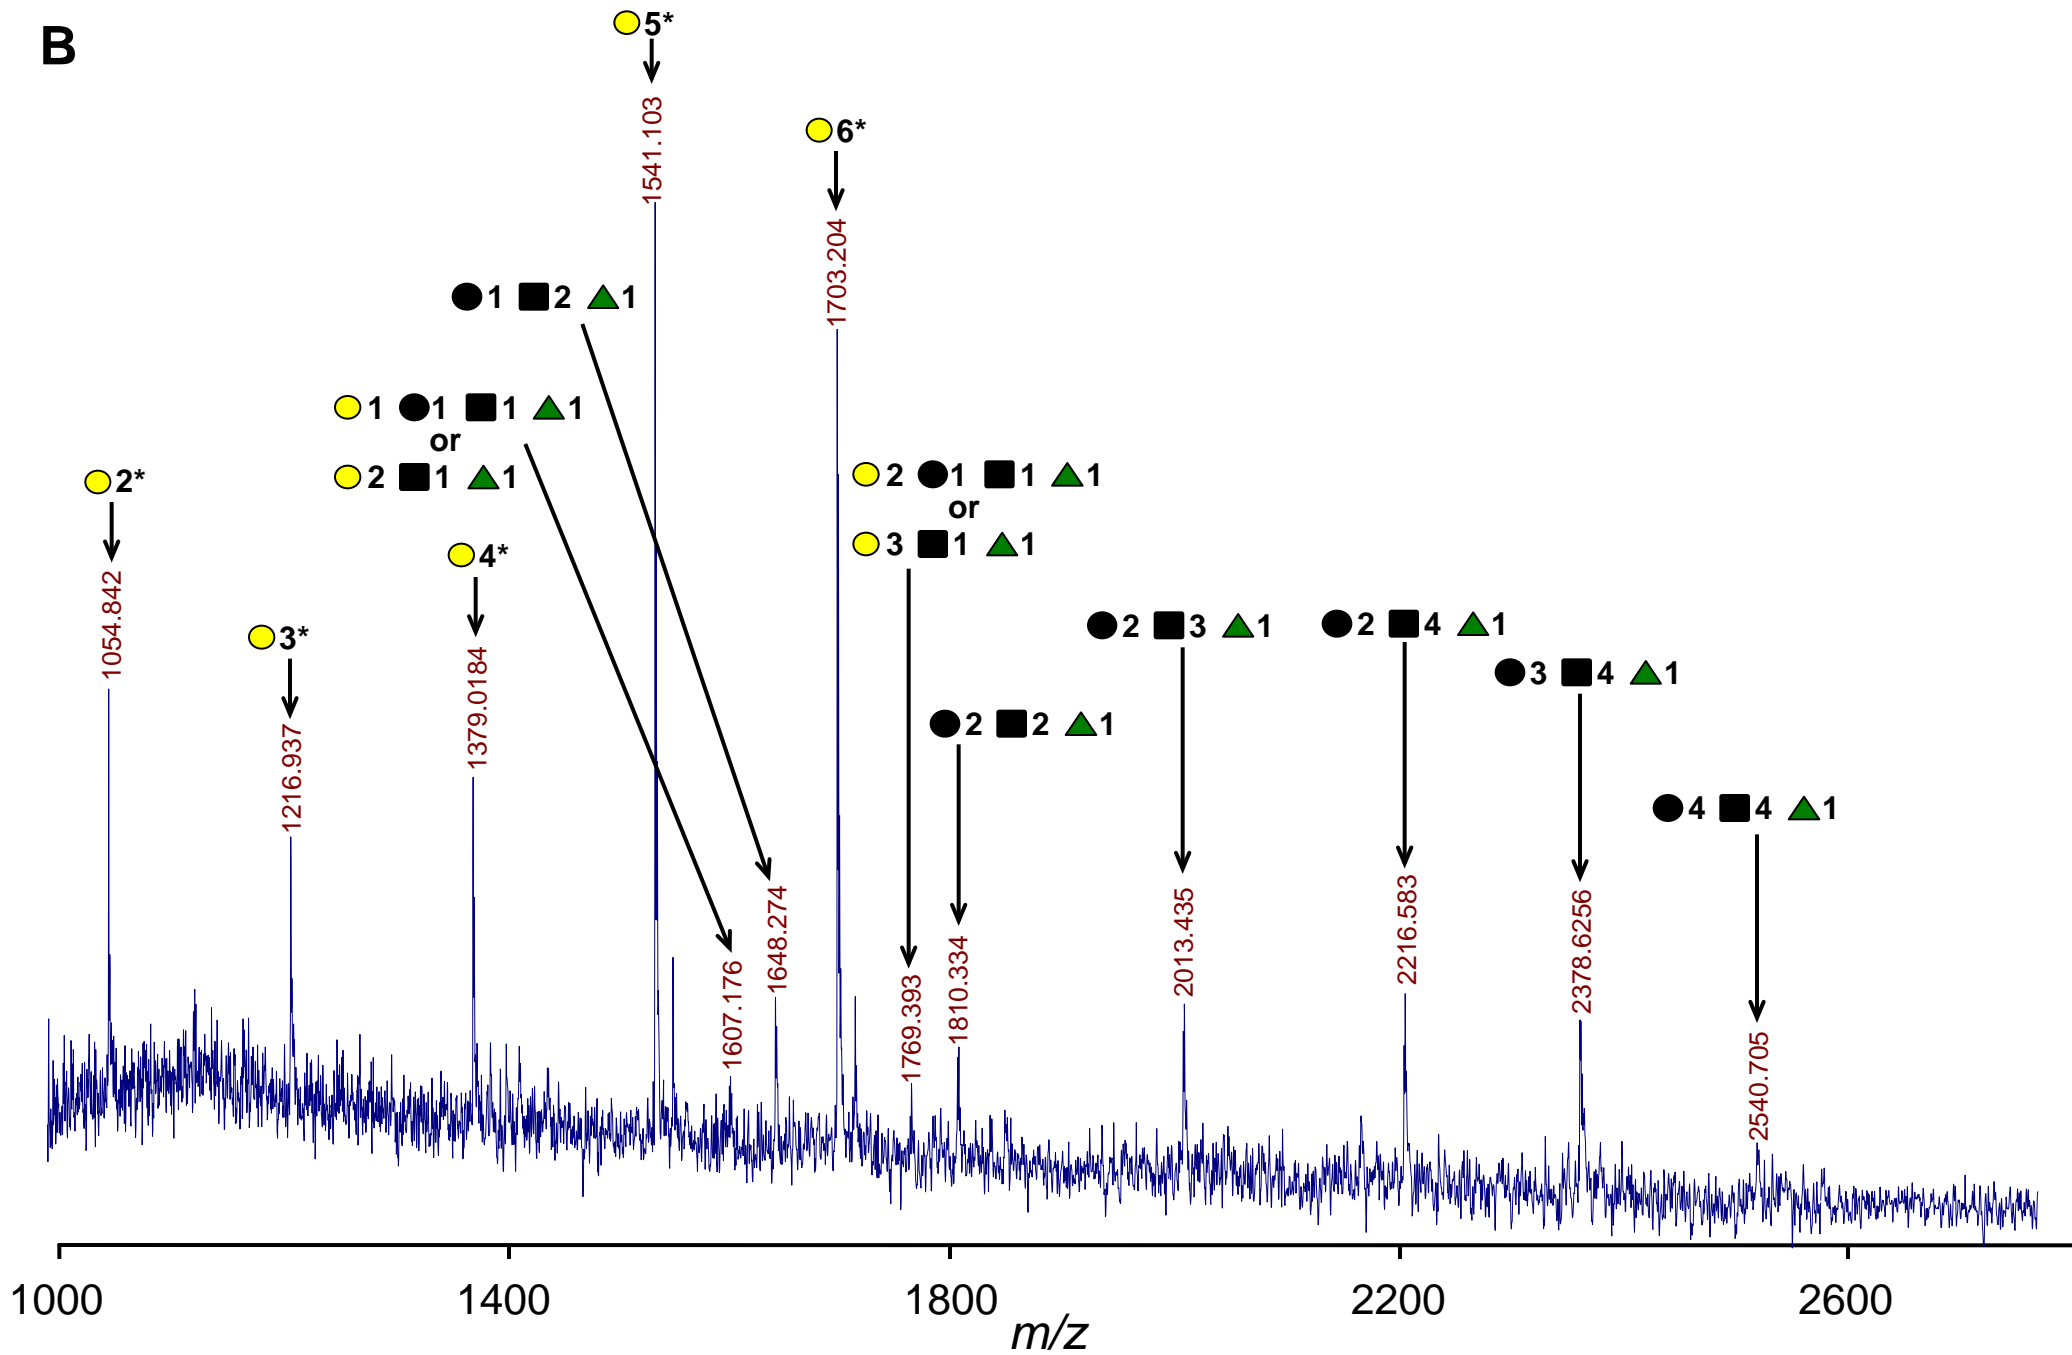

**C**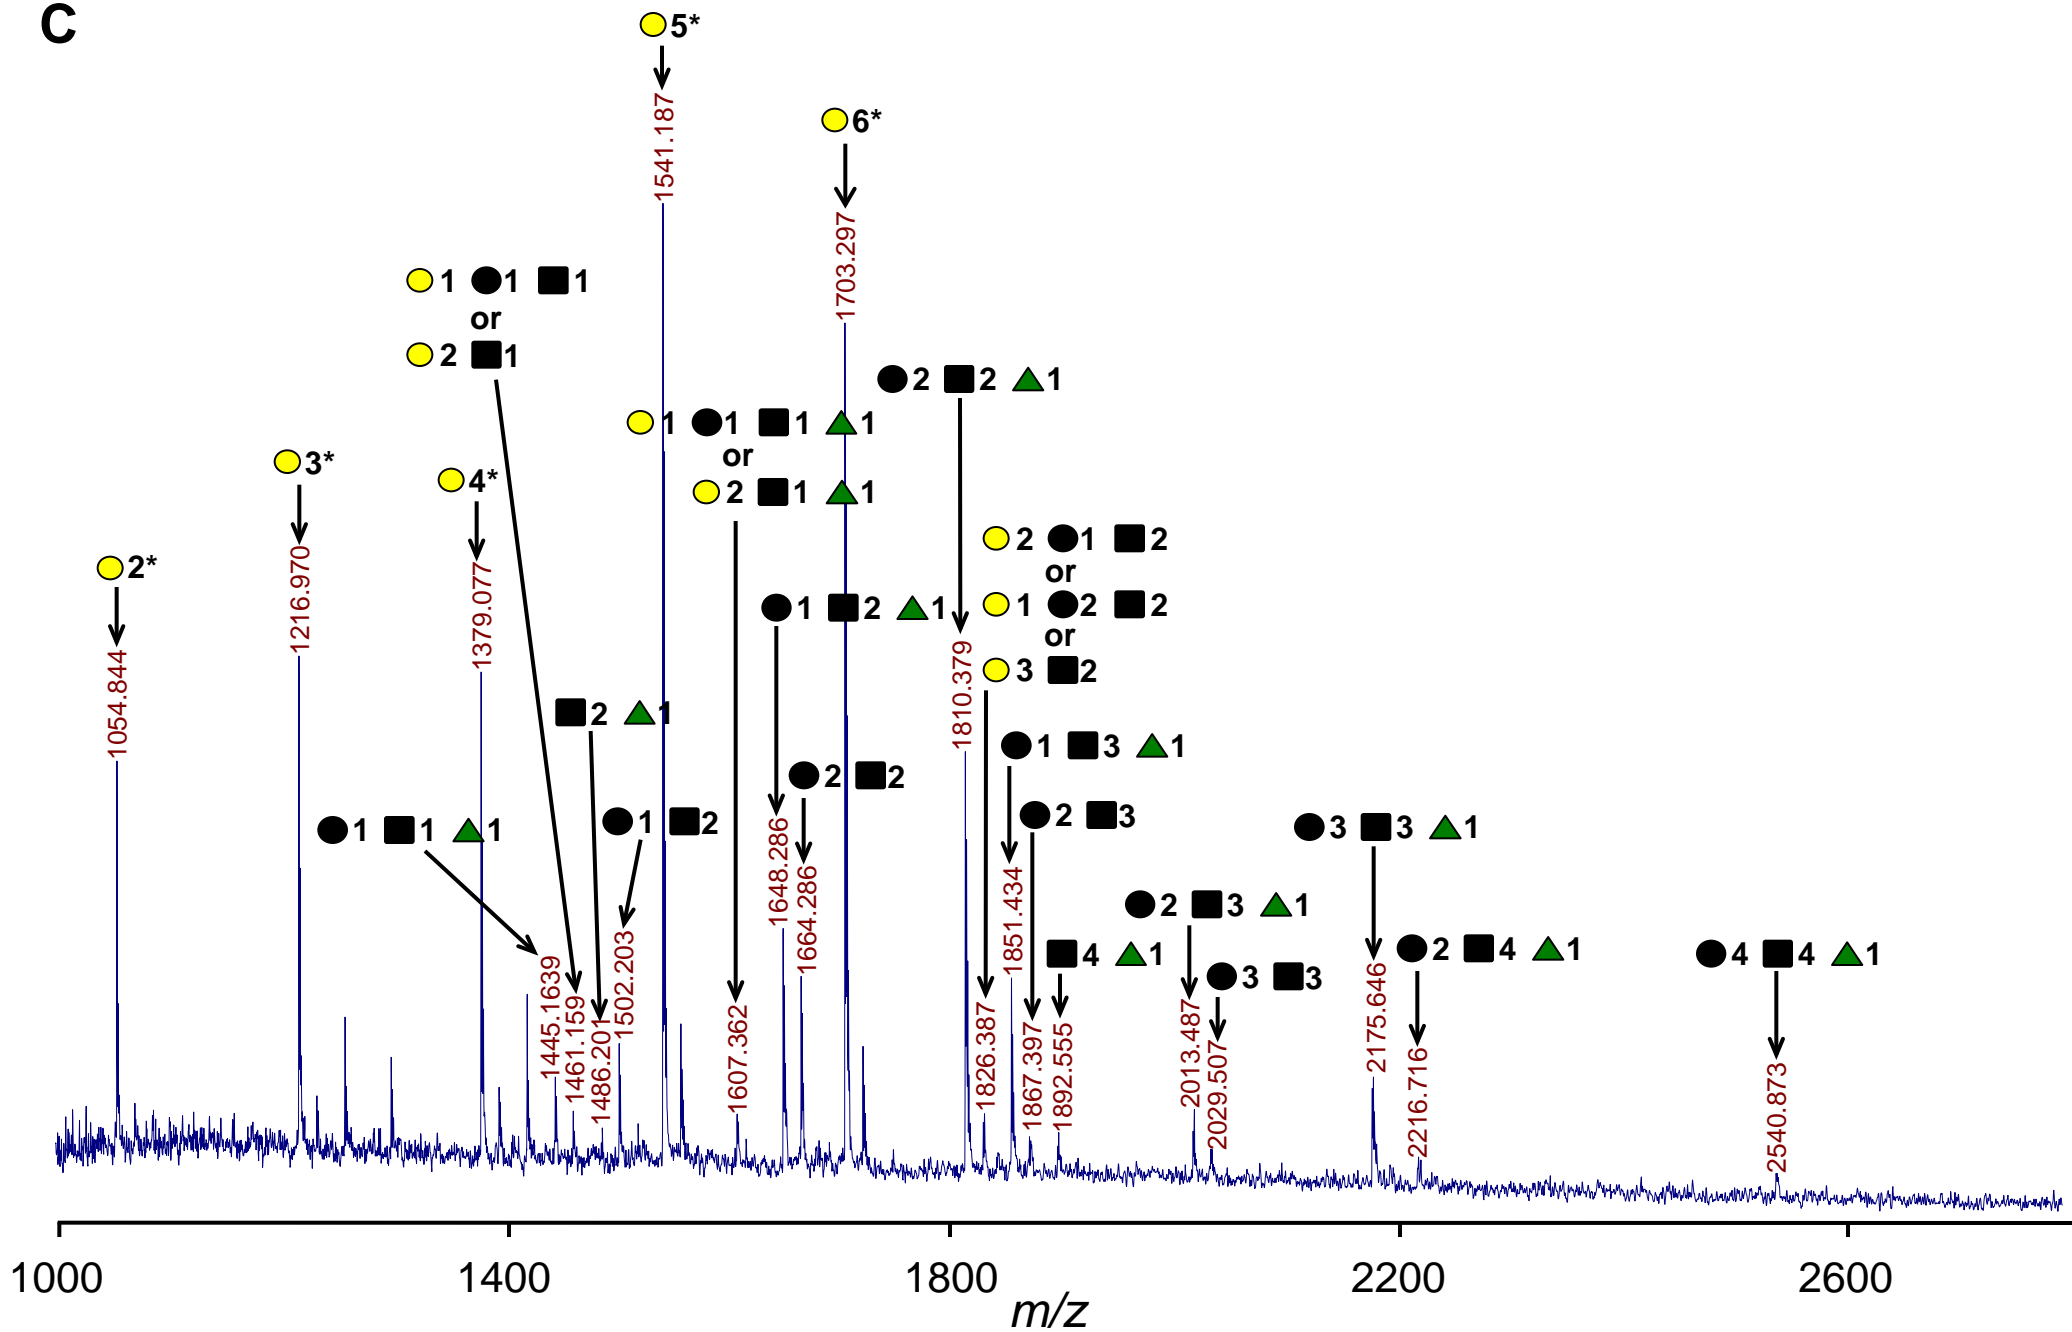

**D**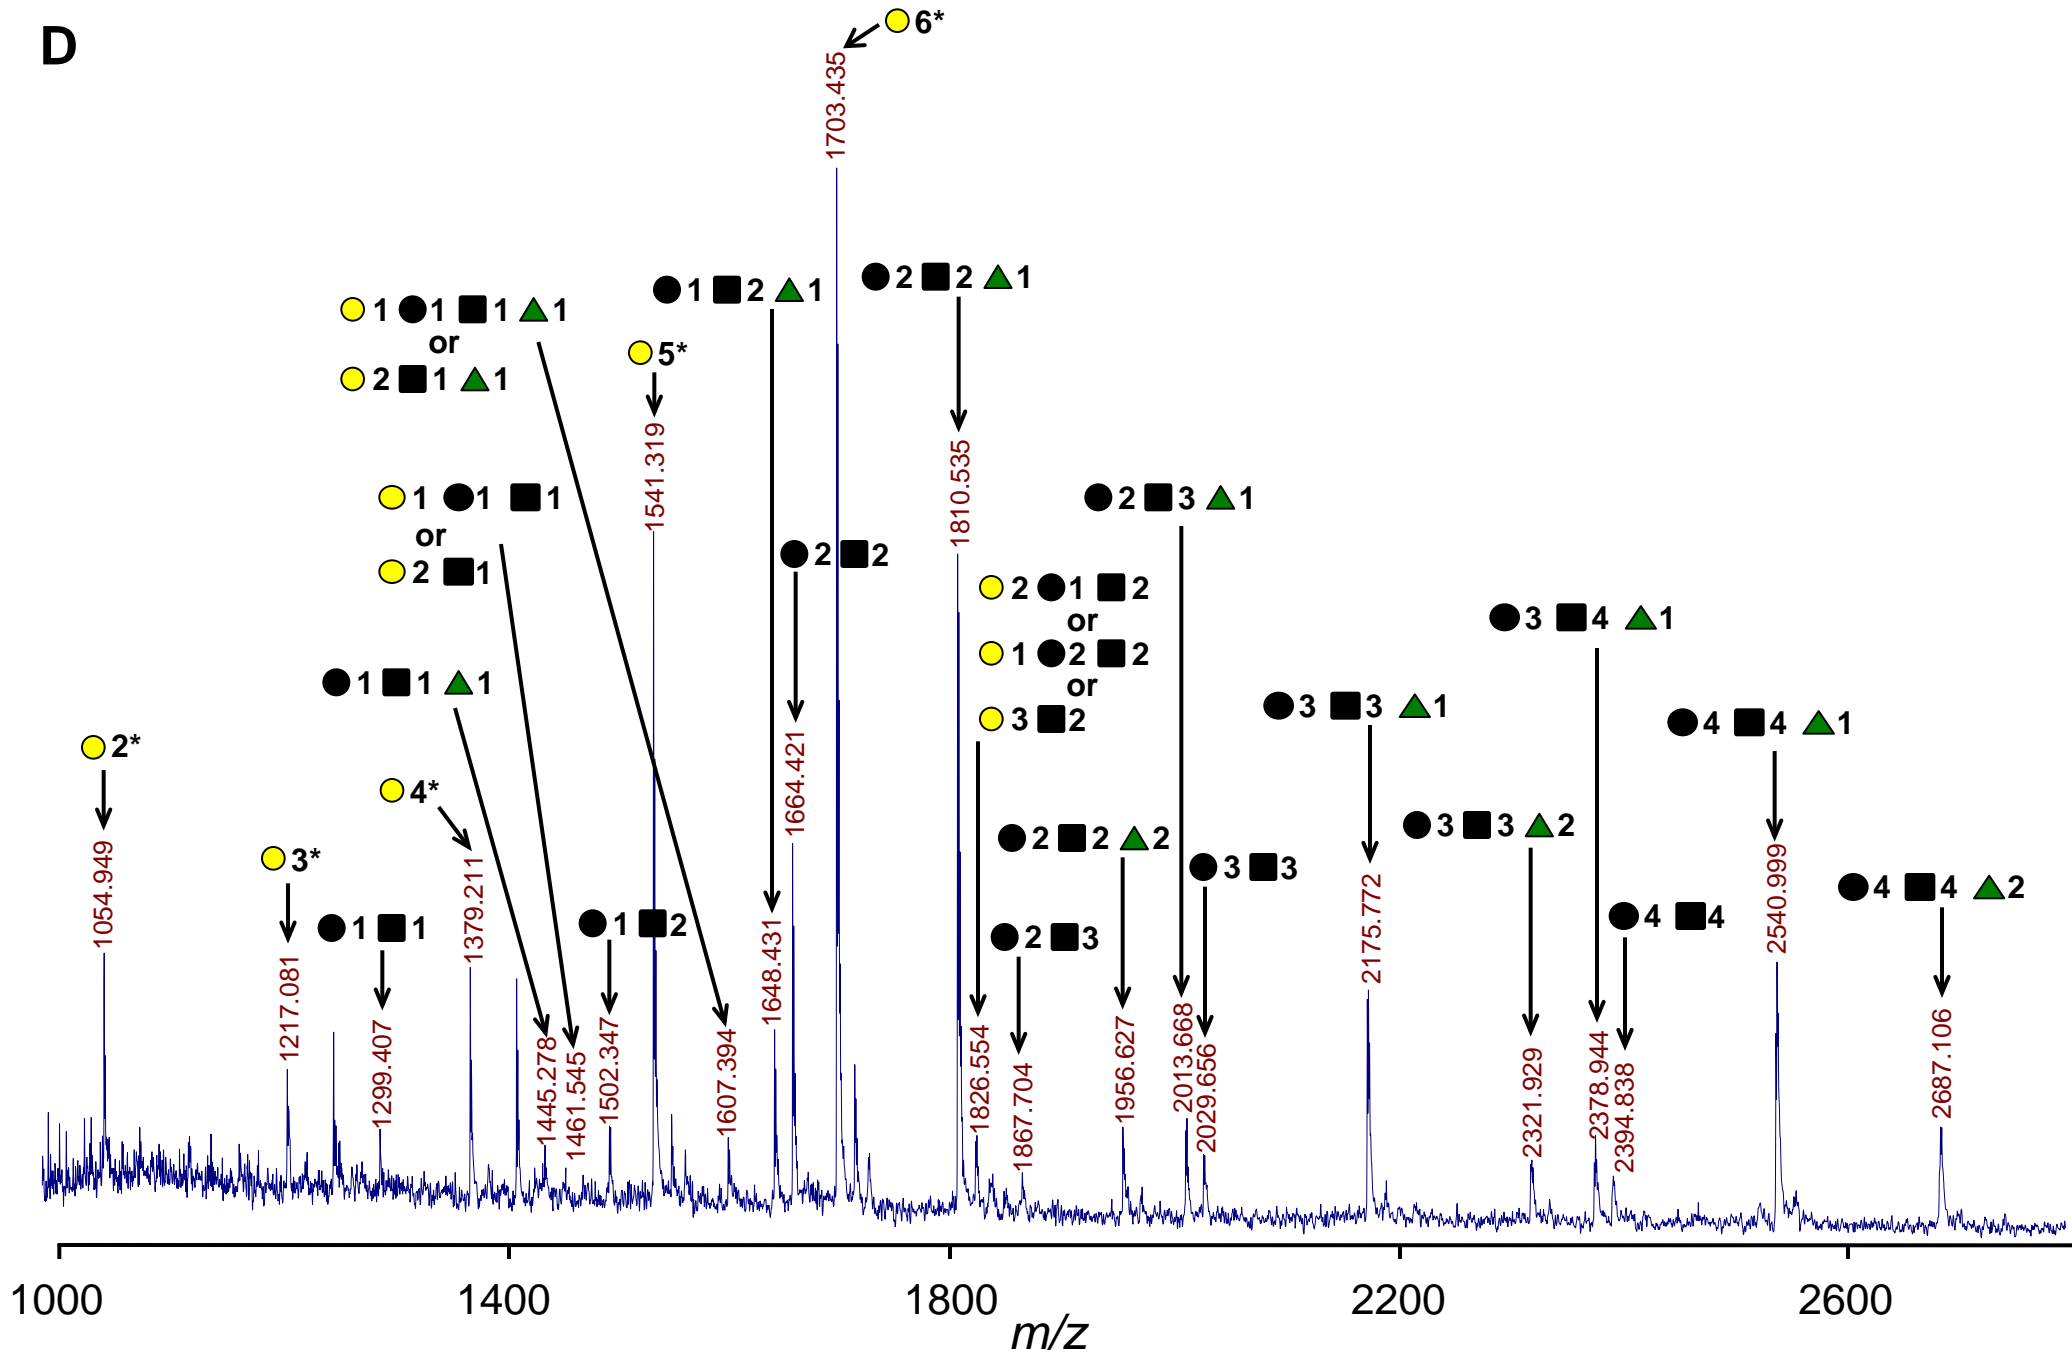

**E**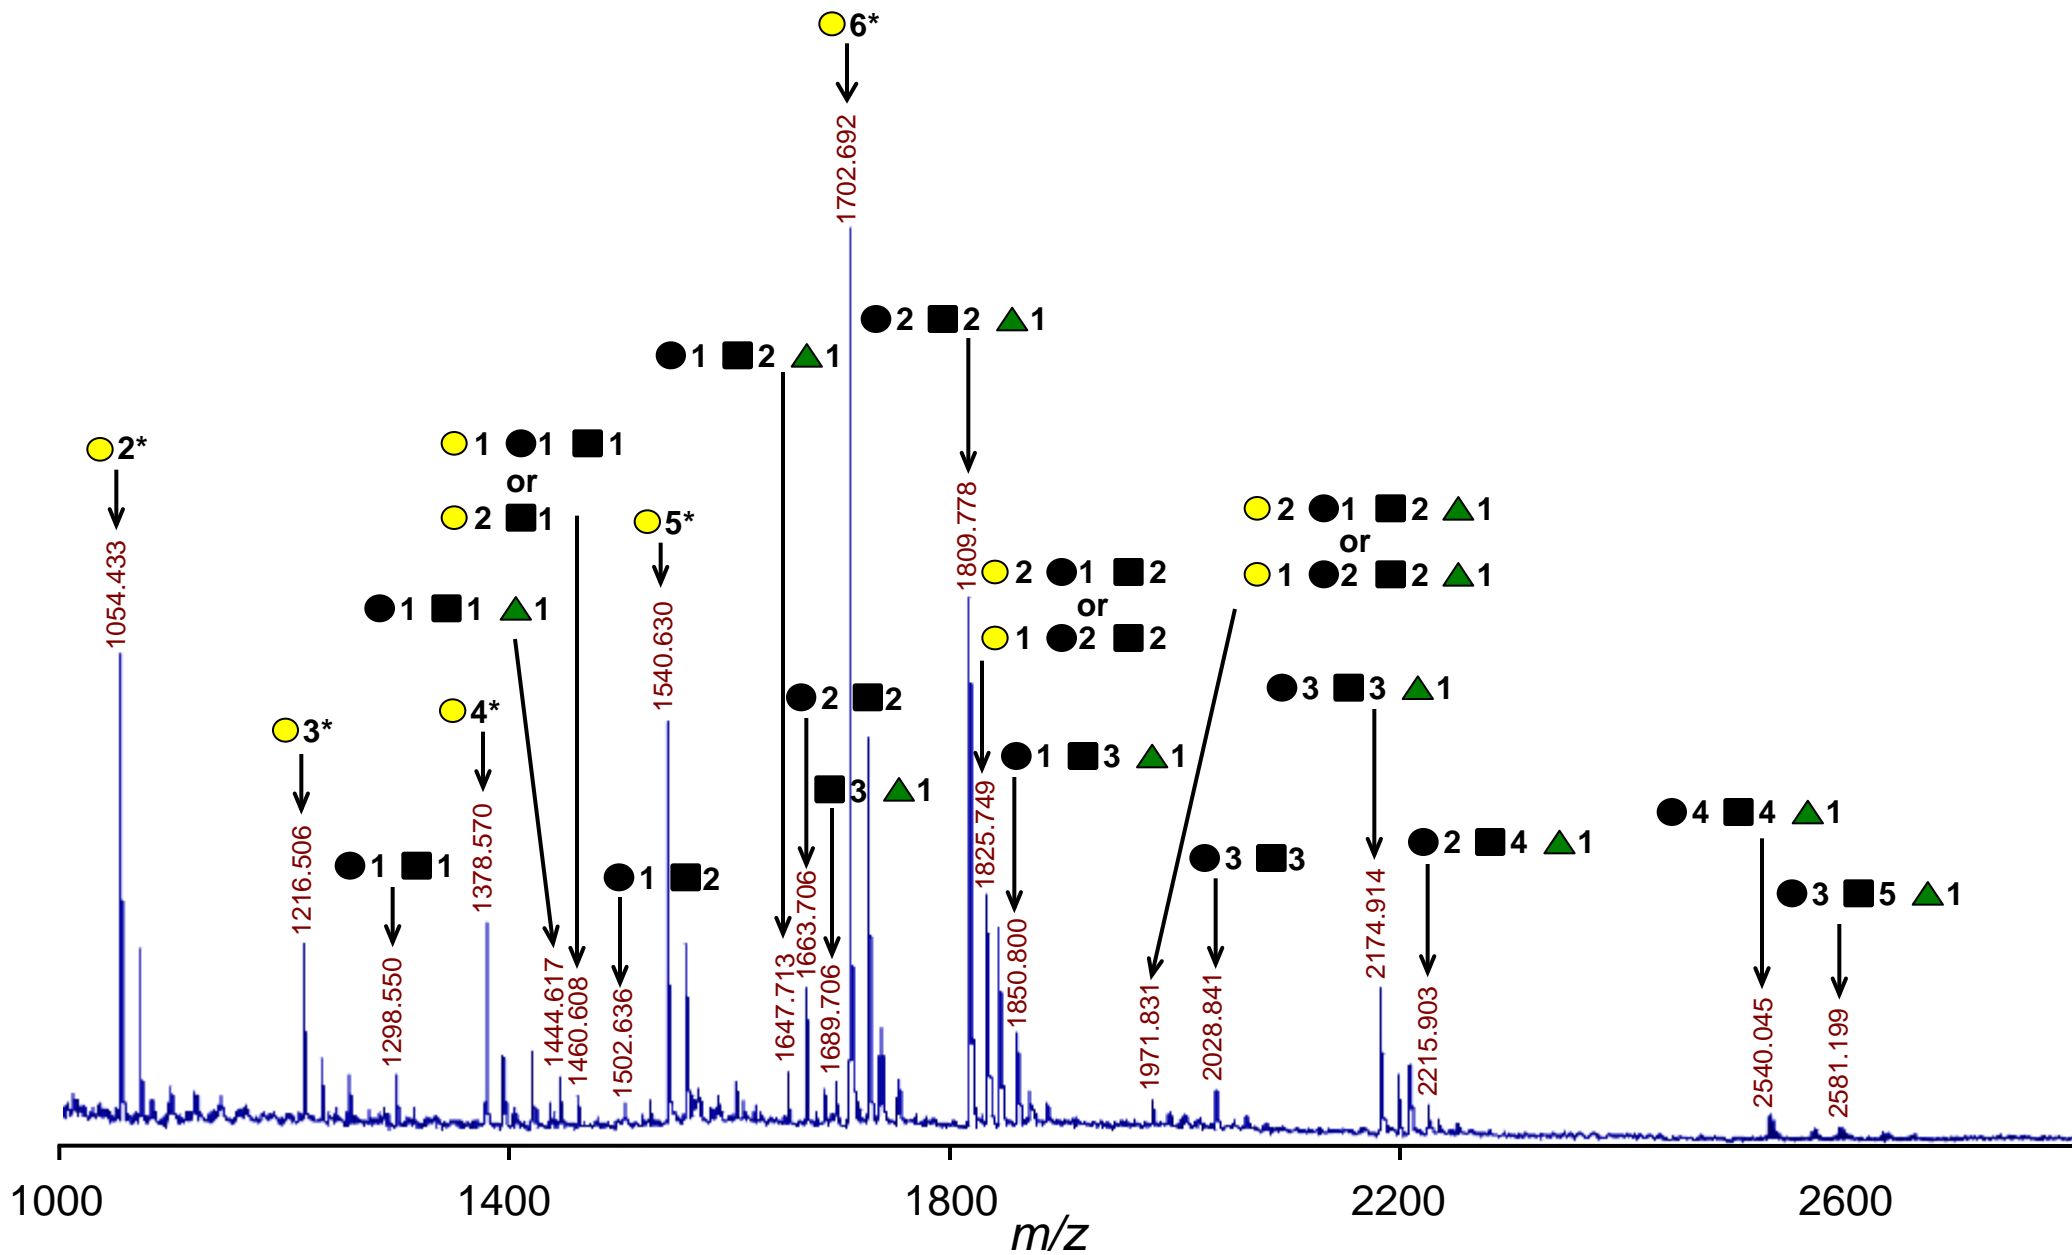

Supplement: supp_M109.085472_corrected.pdf [file supp_M109.085472_corrected.pdf]
