# Supplementary material for: Glycosylation Patterns of HIV-1 gp120 Depend on the Type of Expressing Cells and Affect Antibody Recognition
Source: PubMed Central journal article supplement — J Biol Chem. 2010 May 3;285(27):20860–9. doi: 10.1074/jbc.M109.085472 (PMC2898351; doi:10.1074/jbc.m109.085472), 2010-05-03

Supplemental Figure 1 The recombinant gp120 protein is composed of 581 amino acids (A). The MBL portion is highlighted in red and HIS and V5 tags highlighted in magenta; these segments do not contain any glycosylation sites and afford secretion and multimerization of attached gp120 (MBL), high sensitivity detection by anti-V5-tag antibody (V5), and affinity purification of gp120 protein by NiNTA column (HIS). Underlined are the amino acid epitopes recognized by panel of monoclonal antibodies tested on Western blot. The V3 loop is in italics. The prediction of *N*-linked oligosaccharides was performed using NetNGlyc 1.0 (Technical University of Denmark; <http://www.cbs.dtu.dk/services/NetNGlyc/>). From total 25 potential *N*-glycosylation sites, 18 were over the threshold value 0.5 (B). The prediction of *O*-linked oligosaccharides was performed using NetOGlyc 3.1 (Technical University of Denmark; <http://www.cbs.dtu.dk/services/NetOGlyc/>) (54). The only one potential *O*-glycosylation site was revealed at the position 527. Several subliminal sites were identified (C).

**A**

```
MSLFPSLPLLLLSMVAASYSETVTCEDAQKTCPAVIACSSPGINGFPKDGDRDGTKEKGEPAEKLWVTVYVGVPVWKEA      80
TTTTLFCASDAKAYDTEVHNWVATHACVPTDPNPQEVVLENVTENFNMWKNNMVEQMHEDIISLWDQSLKPCVKLTPLCVT      160
LNCTDLKNNLLNTNSSSSEKMEKGEIKNCSFNITTSIRDKVQKEYALFYKLDVVPIDNNNNTSYRLISCNTSVITQACPK      240
VSFEPIPIHYCAPAGFAILKCNKKFNGTGPCTNVSTVQCTHGIRPVVSTQLLNNGSLAEEEVVIRSENFTDNAKTIIVQ      320
LNESVEINCTRPNNNTRKSIHIGPGRAFYTTGEIIGDIRQAHCNISRAKWNNTLKQIVKKLREQFGNKTIVFNQSSSGGD      400
EIVMHSFNCGGEFFYCNTTQLFNSTWNDNGTWNNTKDKNTITLPCRIKQIINMWQEVGKAMYAPPIRGQIRCSSNITGLL      480
LTRDGGNNNDTEIFRPGGDMRDNRSELYKYKVVKIEPLGVAPTKARRVVQKQDNSADIQHSGGRSSLEGPRFEGK      560
PIPNPLLGLDSTRTGHHHHHHH
```

**B**

NetNGlyc 1.0: predicted N-glycosylation sites in MBL-gp120

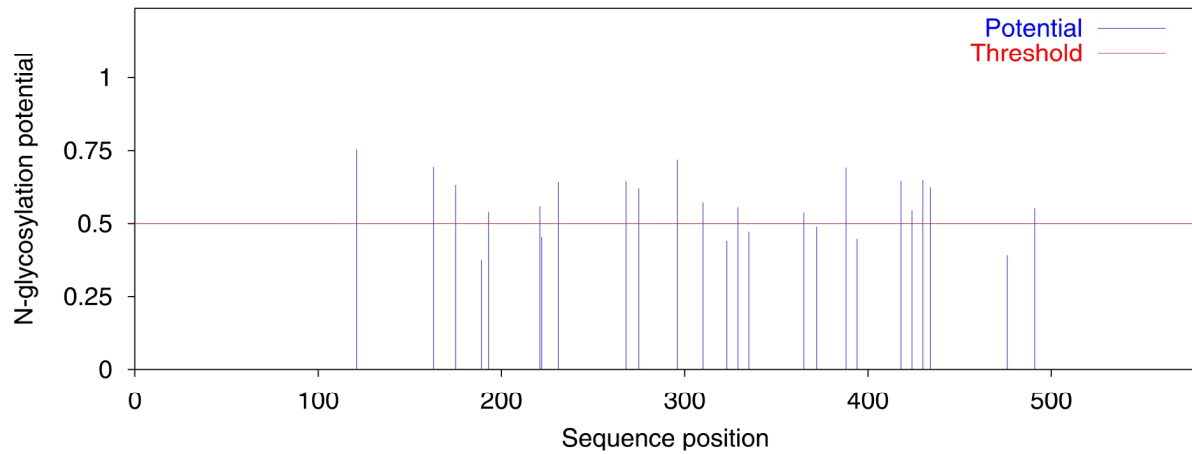

**C**

NetOGlyc 3.1: predicted O-glycosylation sites in MBL.gp120

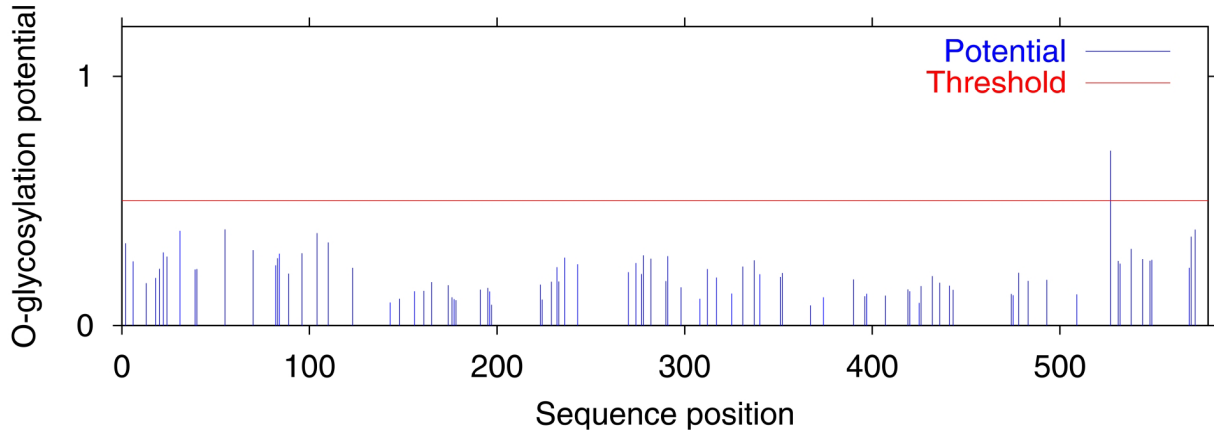

Supplement: supp_M109.085472_Fig1.pdf [file supp_M109.085472_Fig1.pdf]
