# Supplementary material for: Glycosylation Patterns of HIV-1 gp120 Depend on the Type of Expressing Cells and Affect Antibody Recognition
Source: PubMed Central journal article supplement — J Biol Chem. 2010 May 3;285(27):20860–9. doi: 10.1074/jbc.M109.085472 (PMC2898351; doi:10.1074/jbc.m109.085472), 2010-05-03

**Supplemental Figure 2.** Examples of MS/MS spectra for confirmation of glycan identities. **(A)** Infrared multi-photon dissociation (IRMPD) LTQ-FT ICR tandem mass spectra of a high-mannose glycan of gp120 from 293T cell line. **(B)** Collision-induced dissociation (CID) LTQ-ion trap tandem mass spectra of triantennary complex glycan of gp120 from 293T cell line. **(C)** CID LTQ-ion trap tandem mass spectra of high-mannose glycan of gp120 from Jurkat cell line. **(D)** CID LTQ-ion trap tandem mass spectra of fucosylated complex glycan of gp120 from RD cell line. **(E)** CID LTQ-ion trap tandem mass spectra of bi-fucosylated complex glycan of gp120 from HepG2 cell line. **(F)** CID LTQ-ion trap tandem mass spectra of triantennary complex glycan of gp120 from HepG2 cell line. **(G)** CID LTQ FT ICR tandem mass spectra of high mannose glycan of gp120 from CHO cell line. Full rectangle, GlcNAc; full rectangle with \*, reducing-end GlcNAc; empty circle, Man; full circle, Gal; full triangle, Fuc.

**A**

IRMPD FT-ICR MS/MS

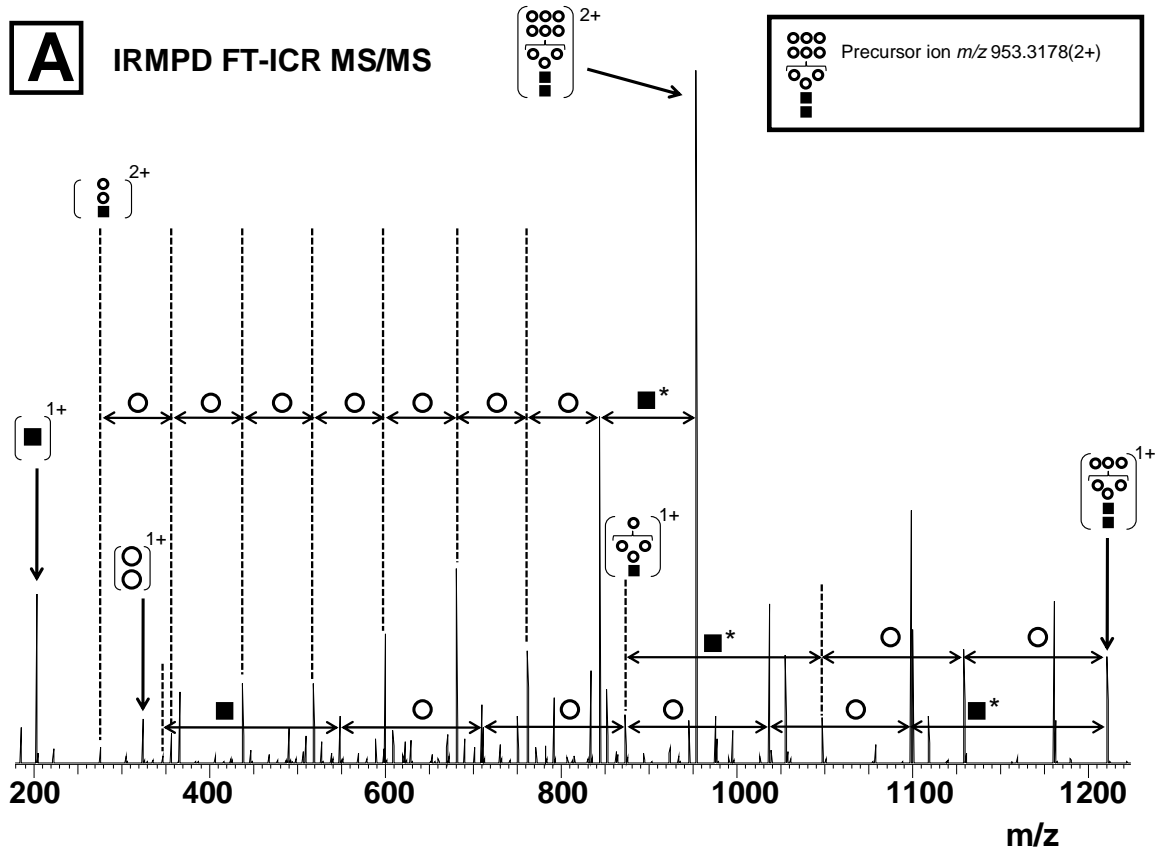

**B**

CID IT MS/MS

Precursor ion  $m/z$  925.8338 (2+)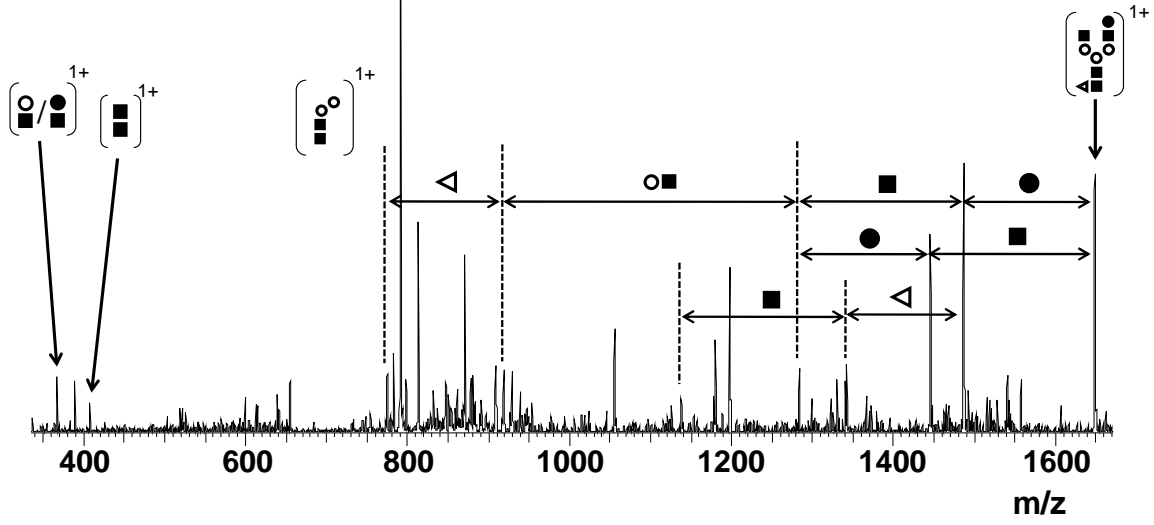

**C**

CID IT MS/MS

 Precursor ion  $m/z$  780.2756(2+)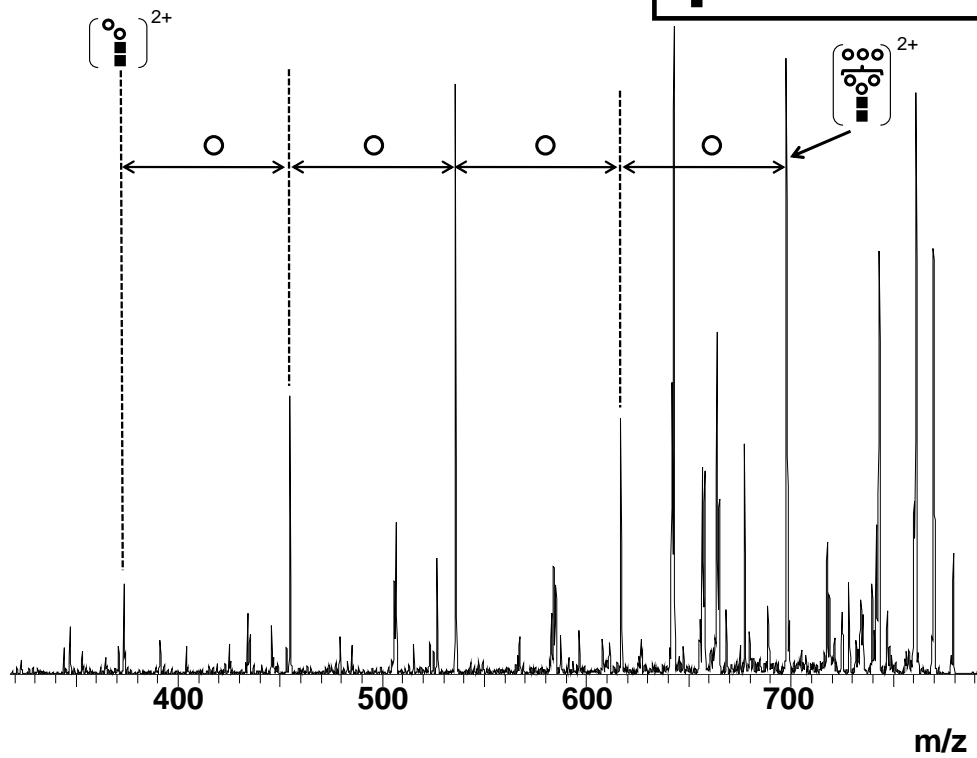

**D**

CID IT MS/MS

Precursor ion  $m/z$  894.3326(2+)

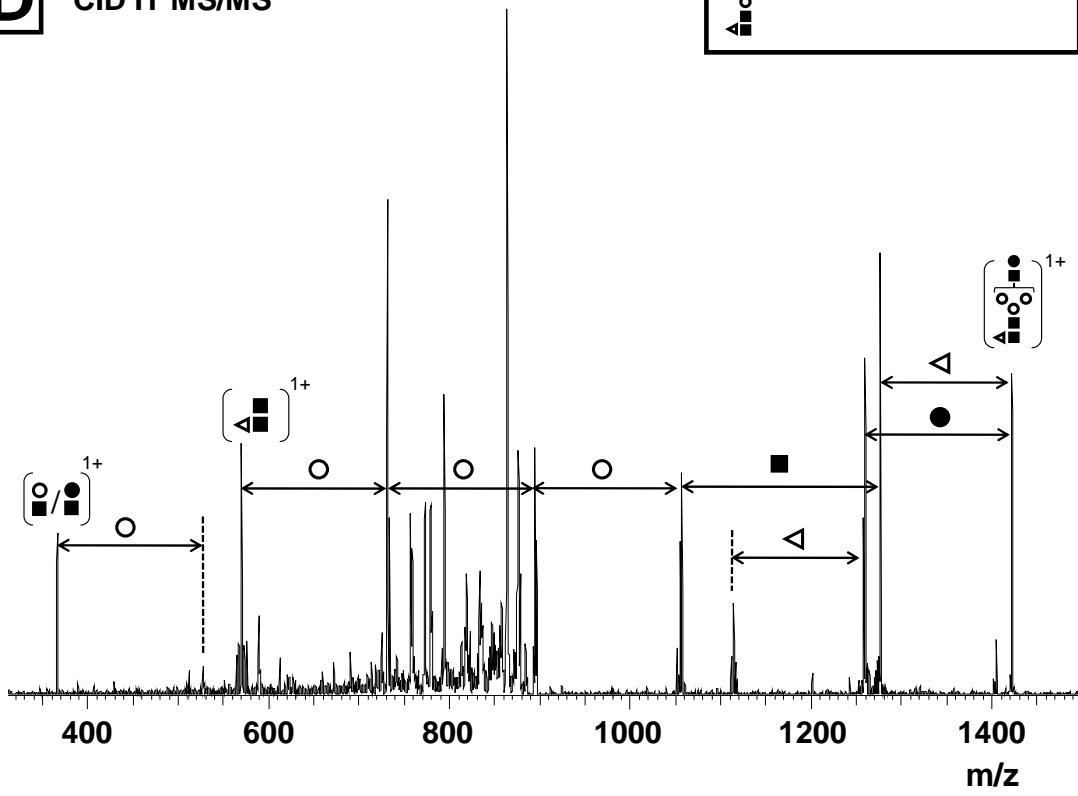

**E****CID IT MS/MS**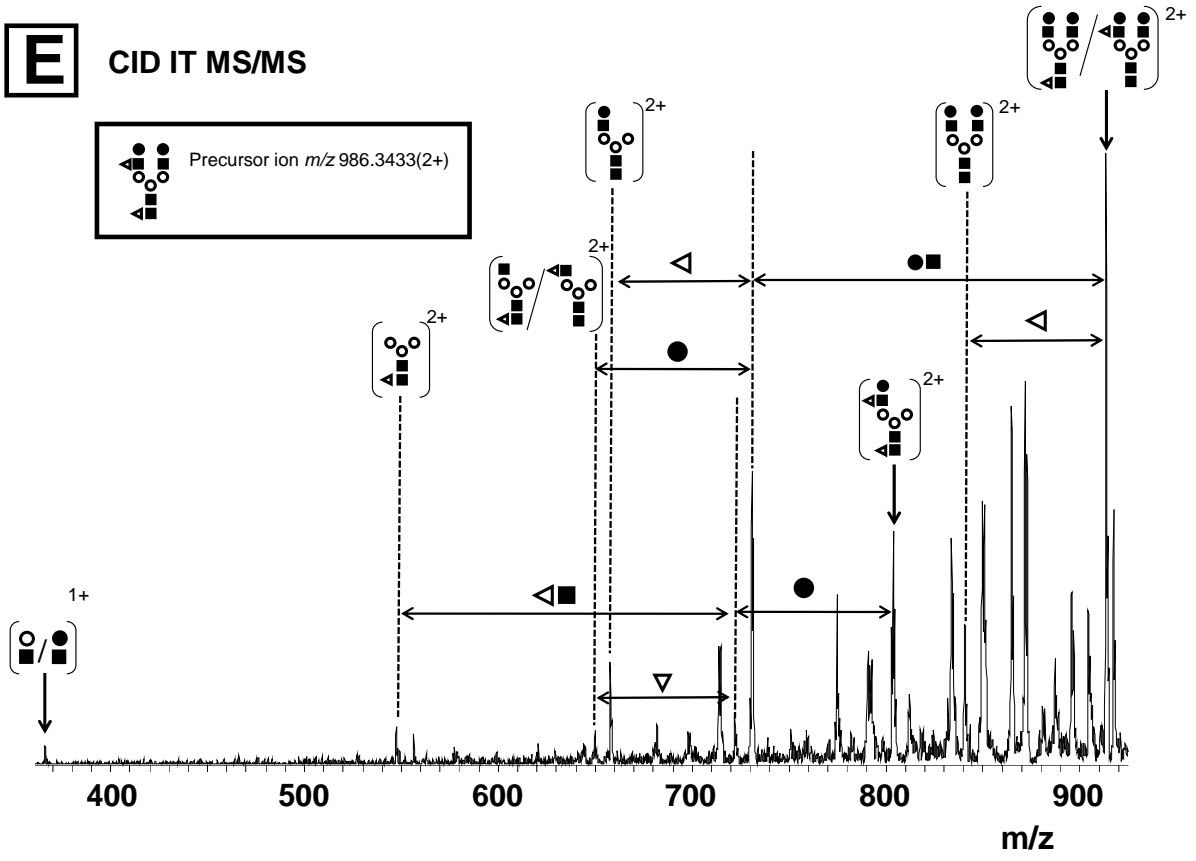

**F**

CID IT MS/MS

Precursor ion  $m/z$  1095.8835(2+)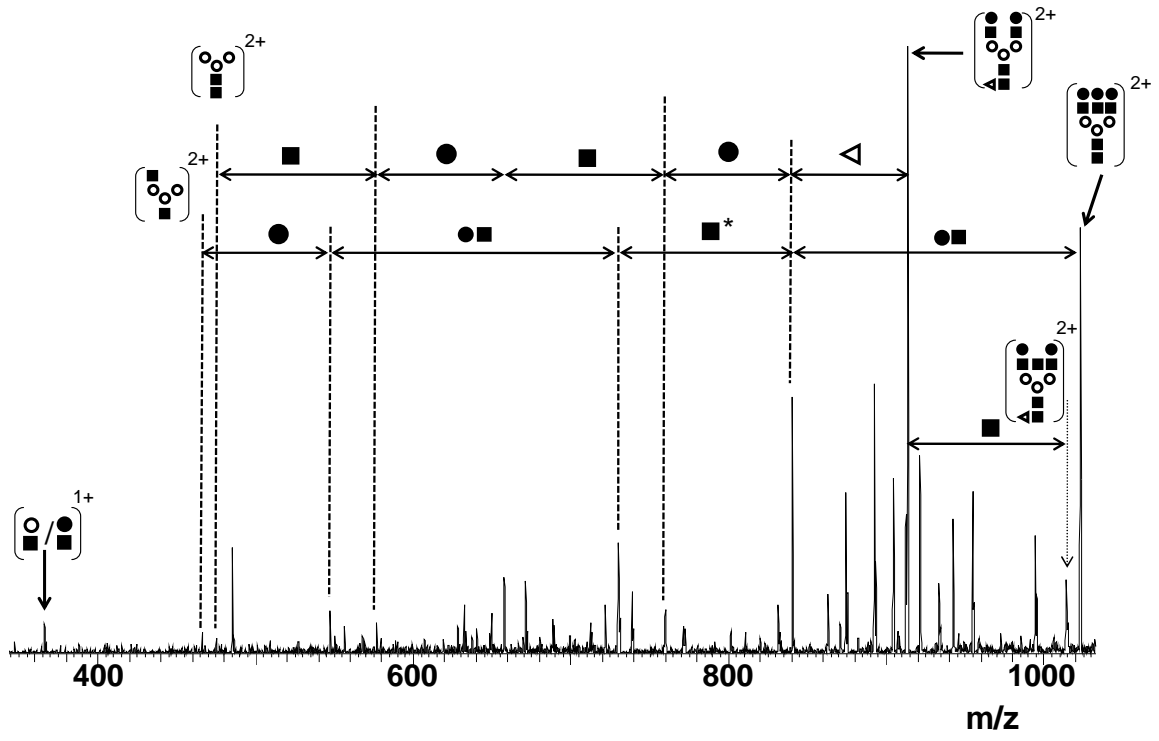

**G****CID FT-ICR MS/MS**Precursor ion  $m/z$  953.3206(2+)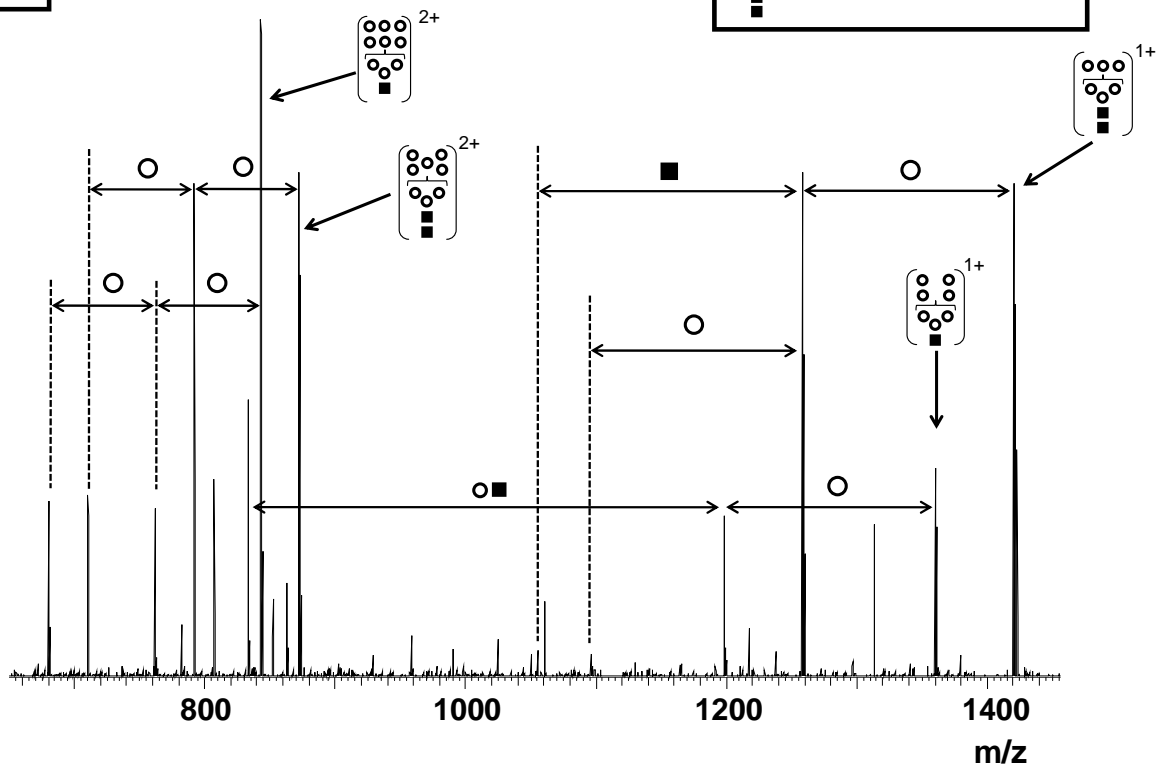

Supplement: supp_M109.085472_Fig2.pdf [file supp_M109.085472_Fig2.pdf]
