# Supplementary material for: Glycosylation Patterns of HIV-1 gp120 Depend on the Type of Expressing Cells and Affect Antibody Recognition
Source: PubMed Central journal article supplement — J Biol Chem. 2010 May 3;285(27):20860–9. doi: 10.1074/jbc.M109.085472 (PMC2898351; doi:10.1074/jbc.m109.085472), 2010-05-03
Supplement: supp_M109.085472_jbc.M109.085472-4.pdf [file supp_M109.085472_jbc.M109.085472-4.pdf]

**Supplemental Table 1** Relative abundance of *N*-glycans from gp120 produced by different cell lines determined by label-free mass spectrometric analysis.

| Number of carbohydrates added to <i>N</i> -glycan core <sup>a</sup> |        |     | 293T           |                                 | Jurkat         |                    | RD             |                    | HepG2          |                    | CHO            |                    |
|---------------------------------------------------------------------|--------|-----|----------------|---------------------------------|----------------|--------------------|----------------|--------------------|----------------|--------------------|----------------|--------------------|
| Hex                                                                 | HexNAc | Fuc | Peak intensity | Relative abundance <sup>b</sup> | Peak intensity | Relative abundance |
| High mannose glycans                                                |        |     |                |                                 |                |                    |                |                    |                |                    |                |                    |
| 2                                                                   | 0      | 0   | 2.57.E+03      | 11.7                            | 2.61.E+03      | 13.5               | 1.75.E+02      | 2.3                | 5.11E+02       | 5.0                | 1.15.E+04      | 17.7               |
| 3                                                                   | 0      | 0   | 1.37.E+03      | 6.2                             | 2.26.E+03      | 11.7               | 1.46.E+03      | 19.4               | 1.78E+02       | 1.7                | 6.03.E+03      | 9.3                |
| 4                                                                   | 0      | 0   | 3.13.E+03      | 14.2                            | 4.70.E+03      | 24.4               | 3.80.E+03      | 50.4               | 2.38E+03       | 23.1               | 9.07.E+03      | 14.0               |
| 5                                                                   | 0      | 0   | 8.76.E+03      | 39.8                            | 1.34.E+04      | 69.4               | 7.54.E+03      | 100.0              | 6.73E+03       | 65.3               | 2.10.E+04      | 32.4               |
| 6                                                                   | 0      | 0   | 2.20.E+04      | 100.0                           | 1.93.E+04      | 100.0              | 5.35.E+03      | 71.0               | 1.03E+04       | 100.0              | 6.48.E+04      | 100.0              |
| Complex / hybrid glycans                                            |        |     |                |                                 |                |                    |                |                    |                |                    |                |                    |
| 1                                                                   | 1      | 0   |                |                                 |                |                    |                |                    | 3.09.E+01      | 0.3                | 8.89.E+02      | 1.4                |
| 1                                                                   | 1      | 1   |                |                                 |                |                    |                |                    |                |                    | 2.27.E+02      | 0.4                |
| 2                                                                   | 1      | 1   | 1.54.E+03      | 7.0                             | 7.69E+02       | 4.0                |                |                    |                |                    |                |                    |
| 3                                                                   | 1      | 0   | 1.36.E+03      | 6.2                             |                |                    |                |                    |                |                    |                |                    |
| 3                                                                   | 1      | 1   | 6.95.E+02      | 3.2                             | 5.45E+02       | 2.8                |                |                    |                |                    |                |                    |
| 1                                                                   | 2      | 1   | 6.08.E+02      | 2.8                             |                |                    | 3.02.E+01      | 0.4                | 4.73.E+02      | 4.6                | 1.58.E+02      | 0.2                |
| 2                                                                   | 2      | 0   |                |                                 | 5.13E+02       | 2.7                | 3.86.E+01      | 0.5                | 9.18.E+02      | 8.9                | 1.95.E+03      | 3.0                |
| 2                                                                   | 2      | 1   | 1.73.E+03      | 7.9                             | 7.87E+02       | 4.1                | 9.62.E+01      | 1.3                | 2.75.E+03      | 26.7               | 1.51.E+04      | 23.3               |
| 2                                                                   | 2      | 2   |                |                                 |                |                    |                |                    | 4.40.E+02      | 4.3                |                |                    |
| 3                                                                   | 2      | 0   | 2.02.E+03      | 9.2                             |                |                    | 8.50.E+01      | 1.1                | 1.78.E+03      | 17.3               |                |                    |
| 3                                                                   | 2      | 1   |                |                                 |                |                    |                |                    |                |                    | 8.83.E+02      | 1.4                |
| 4                                                                   | 2      | 0   | 1.76.E+02      | 0.8                             |                |                    |                |                    |                |                    |                |                    |
| 0                                                                   | 3      | 1   | 1.19.E+02      | 0.5                             |                |                    |                |                    |                |                    |                |                    |
| 1                                                                   | 3      | 1   | 8.54.E+02      | 3.9                             |                |                    | 5.40.E+01      | 0.7                | 1.22.E+02      | 1.2                |                |                    |
| 2                                                                   | 3      | 0   |                |                                 |                |                    |                |                    | 3.06.E+01      | 0.3                |                |                    |
| 2                                                                   | 3      | 1   | 2.69.E+02      | 1.2                             |                |                    | 2.07.E+01      | 0.3                | 3.86.E+02      | 3.8                |                |                    |
| 2                                                                   | 3      | 2   |                |                                 |                |                    |                |                    | 6.15.E+01      | 0.6                |                |                    |
| 3                                                                   | 3      | 0   | 1.42.E+01      | 0.1                             | 3.20E+02       | 1.7                |                |                    | 3.81.E+02      | 3.7                | 4.02.E+02      | 0.6                |
| 3                                                                   | 3      | 1   | 3.12.E+02      | 1.4                             | 1.35E+02       | 0.7                | 2.46.E+01      | 0.3                | 1.66.E+03      | 16.1               | 6.88.E+02      | 1.1                |
| 3                                                                   | 3      | 2   |                |                                 |                |                    |                |                    | 5.34.E+02      | 5.2                |                |                    |
| 0                                                                   | 4      | 1   |                |                                 |                |                    | 3.05.E+01      | 0.4                |                |                    |                |                    |
| 1                                                                   | 4      | 1   | 8.95.E+02      | 4.1                             |                |                    |                |                    |                |                    |                |                    |
| 2                                                                   | 4      | 1   | 2.33.E+02      | 1.1                             | 4.85E+01       | 0.3                |                |                    | 7.64.E+01      | 0.7                |                |                    |
| 3                                                                   | 4      | 1   |                |                                 | 8.90E+01       | 0.5                |                |                    | 5.46.E+02      | 5.3                |                |                    |
| 4                                                                   | 4      | 0   | 1.46.E+02      | 0.7                             |                |                    |                |                    | 7.30.E+01      | 0.7                |                |                    |
| 4                                                                   | 4      | 1   |                |                                 | 3.38E+01       | 0.2                |                |                    | 1.49.E+03      | 14.5               |                |                    |

<sup>a</sup>*N*-glycan core is (GlcNAc)2(Man)3; <sup>b</sup>Relative abundance was calculated relative to the most intense peak in each sample being set to 100%.
